# Supplementary material for: Generation of primary human intestinal T cell transcriptomes reveals differential expression at genetic risk loci for immune-mediated disease
Source: PubMed Central journal article supplement (PMC4316924; doi:10.1136/gutjnl-2013-306657), 2014-05-05
Supplement: gutjnl-2013-306657-s2.pdf [file gutjnl-2013-306657-s2.pdf]

**Supplemental Figure 1** Sample acquisition and processing to ensure high data quality. **(a-f)** CD4<sup>+</sup> and CD8<sup>+</sup> T cell effector memory subpopulations were selected by polychromatic flow sorting. Flow cytometry was used to define cells as T cells if they fell within a lymphocyte gate (defined on forward-scatter/sidescatter), a singlet gate (defined on forward-scatter height vs. width), and a series of polychromatic gates defined as CD3<sup>+</sup> TCR $\alpha\beta$ <sup>+</sup> CD19<sup>-</sup> CD326<sup>-/lo</sup> DAPI<sup>-</sup>. Staining for CD62L and CD45RO were used to indicate cellular activation and memory status, with T<sub>EM</sub> status defined as CD45RO<sup>+</sup> CD62L<sup>-</sup>. The same approach was applied to LPLs **(a,b)**, IELs **(c,d)** and peripheral blood cells **(e,f)**. T cells were then further subcharacterised as CD4<sup>+</sup> CD8 $\alpha$ -CD8 $\beta$ <sup>-</sup> (CD4<sup>+</sup>, **a,c,e**) or CD4<sup>-</sup> CD8 $\alpha$ <sup>+</sup> CD8 $\beta$ <sup>+</sup> (CD8<sup>+</sup>, **b,d,f**). The percentage of the parent population falling within each quadrant is shown in red. T<sub>EM</sub> subpopulations defined in this way were sorted for RNA extraction. Plots are representative examples from a single subject. **(g)** RNA degradation plot for each of the 36 arrays. Individual probes in each probeset are ordered by location relative to the 5' end of the targeted RNA molecule and scaled to uniform standard deviation. Average probe intensity at each location is plotted relative to a fixed 5' starting point that is incrementally shifted for each array. *p* values for testing the gradient of all slopes as non-zero were nonsignificant. **(h)** Boxplots representing summaries of the log<sub>2</sub> signal intensity distribution of the arrays after RMA processing and batch correction; computation of the Kolmogorov-Smirnov statistic  $K_a$  did not detect any array as an outlier.

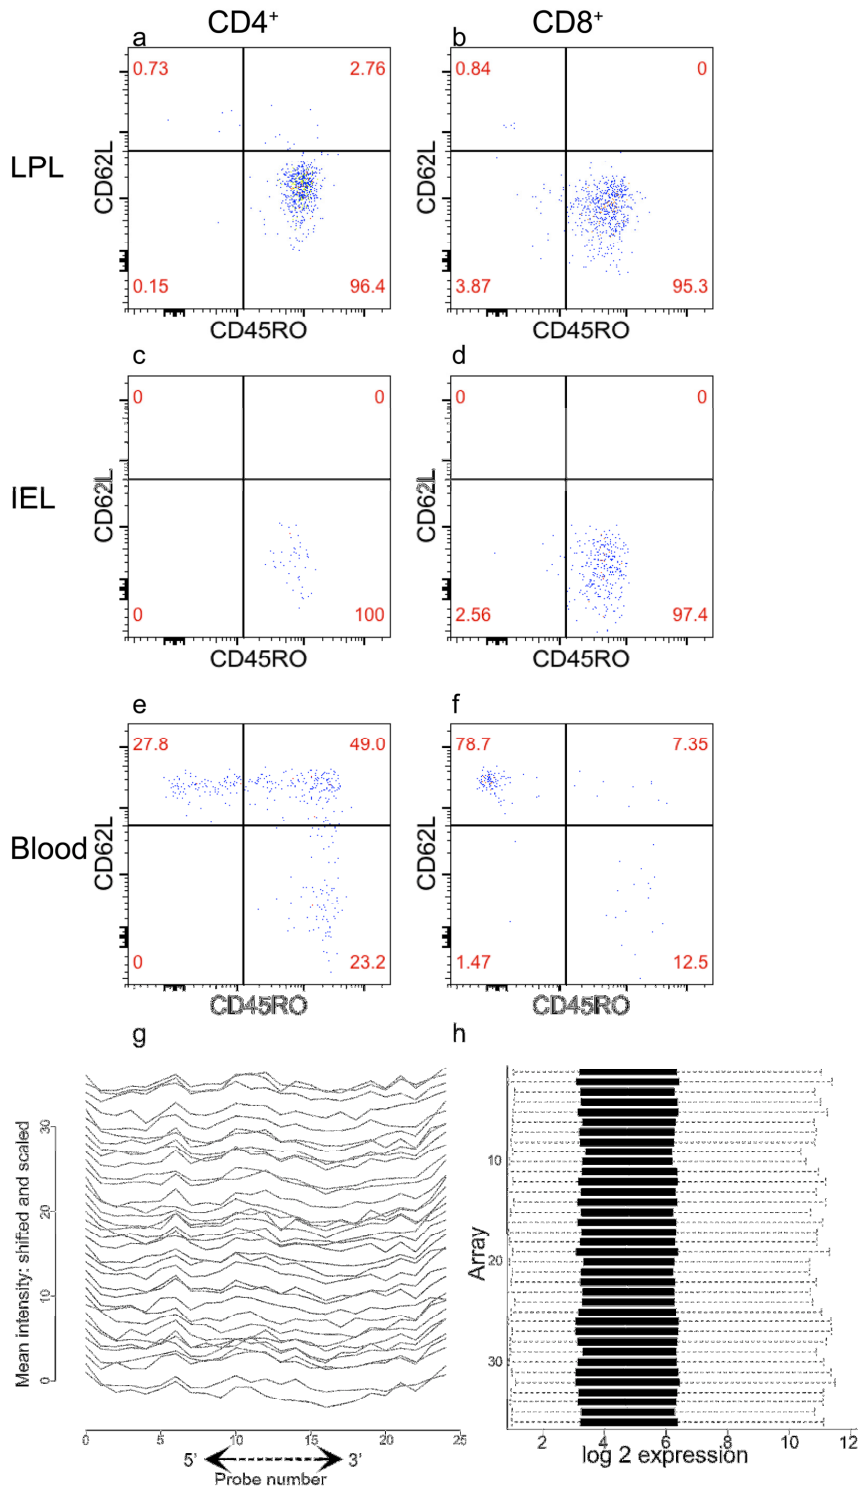

Raine *et al.* Supplemental Figure 1

**Supplemental Figure 2** Gut T<sub>EM</sub> cell populations show both shared and unique differentially expressed genes. **(a,b)** For each gut T<sub>EM</sub> cell population, lists of genes showing upregulation **(a)** and downregulation **(b)** compared to paired peripheral blood T<sub>EM</sub> cells were compared for shared and distinct members. Differential expression was defined as  $\geq 1.4$  fold change with  $p < 0.05$  after adjustment for multiple testing. Euler diagrams are shown with areas of overlap approximating to the proportion of overlap between lists, as well as absolute numbers of shared transcripts.

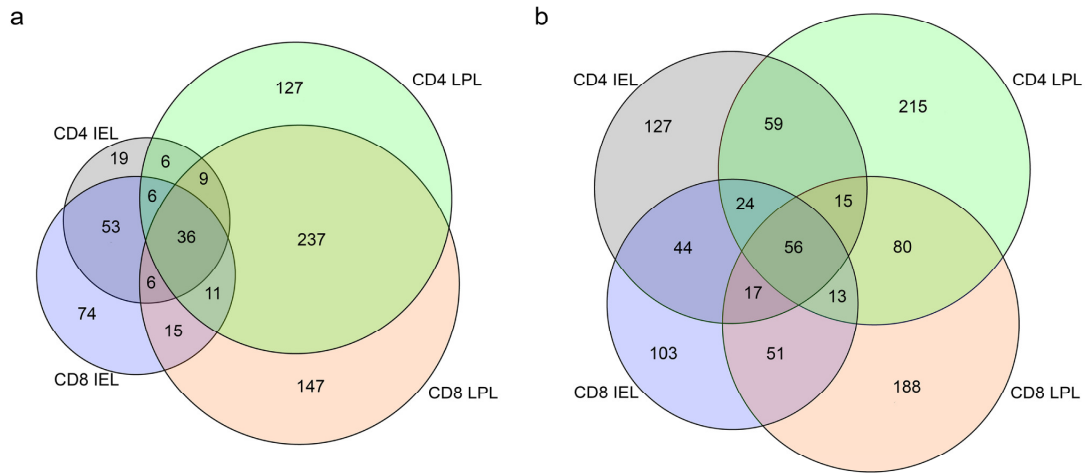

Raine *et al.* Supplemental Figure 2

**Supplemental Figure 3** Gut T<sub>EM</sub> subsets express a core subset of transcripts showing similar patterns of expression relative to peripheral blood T<sub>EM</sub> cells. **(a,b)** Transcripts are listed that show upregulation **(a)** or downregulation **(b)** across all gut T<sub>EM</sub> subsets relative to their paired peripheral blood T<sub>EM</sub> cell counterparts. The fold-change is indicated, and the background shaded to reflect this, according to the key.

a

| Gene     | CD4 IEL | CD8 IEL | CD4 LPL | CD8 LPL |
|----------|---------|---------|---------|---------|
| FOS      | 35.76   | 22.23   | 48.99   | 55.15   |
| GPR34    | 21.85   | 48.88   | 6.54    | 19.70   |
| FOSB     | 17.56   | 14.90   | 28.72   | 32.27   |
| RGS1     | 15.55   | 10.91   | 34.04   | 31.31   |
| RASGEF1B | 2.29    | 2.19    | 34.01   | 34.41   |
| CCL20    | 7.77    | 4.54    | 39.22   | 6.33    |
| EGR1     | 13.89   | 10.18   | 13.76   | 16.17   |
| IL2      | 5.99    | 7.00    | 17.18   | 14.54   |
| JUN      | 9.72    | 12.58   | 8.71    | 11.88   |
| CD69     | 6.40    | 6.68    | 12.89   | 12.87   |
| PELO     | 7.59    | 13.06   | 8.02    | 10.12   |
| SPINK2   | 6.11    | 13.85   | 4.33    | 11.97   |
| ITGAE    | 10.75   | 11.45   | 3.15    | 5.96    |
| SPRY1    | 3.61    | 4.41    | 8.75    | 12.98   |
| LRRN3    | 4.68    | 8.91    | 4.22    | 9.19    |
| CCR9     | 4.55    | 7.84    | 5.71    | 5.95    |
| PPP1R15A | 2.79    | 2.73    | 8.68    | 9.02    |
| SKIL     | 3.76    | 3.89    | 7.63    | 6.47    |
| CD9      | 4.22    | 7.12    | 1.92    | 4.49    |
| CD101    | 4.85    | 6.07    | 2.50    | 3.02    |
| ASB2     | 4.16    | 4.45    | 3.74    | 3.79    |
| JUNB     | 2.73    | 2.30    | 4.55    | 4.20    |
| EPAS1    | 2.41    | 2.74    | 3.68    | 4.75    |
| DUSP6    | 3.98    | 3.37    | 2.80    | 2.84    |
| NDFIP2   | 3.13    | 4.27    | 2.65    | 2.06    |
| DSE      | 3.33    | 3.81    | 2.77    | 2.07    |
| FURIN    | 2.87    | 1.89    | 4.44    | 2.55    |
| ARHGAP18 | 2.85    | 3.95    | 2.11    | 2.79    |
| CA10     | 3.08    | 3.31    | 2.33    | 2.26    |
| ABCB1    | 3.57    | 2.69    | 1.99    | 2.13    |
| ARHGEF12 | 2.40    | 2.27    | 2.75    | 2.23    |
| C18orf1  | 1.74    | 2.17    | 2.56    | 2.99    |
| TMEM200A | 2.41    | 3.17    | 1.70    | 1.96    |
| MAN1A1   | 2.63    | 1.88    | 2.03    | 1.77    |
| ARHGAP9  | 2.01    | 1.78    | 2.06    | 2.04    |
| LAG3     | 1.91    | 1.54    | 2.42    | 1.57    |

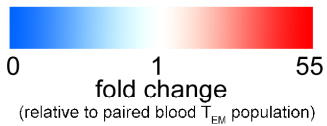

b

| Gene     | CD4 IEL | CD8 IEL | CD4 LPL | CD8 LPL |
|----------|---------|---------|---------|---------|
| CX3CR1   | 0.07    | 0.02    | 0.14    | 0.04    |
| S1PR1    | 0.06    | 0.05    | 0.13    | 0.10    |
| SAMD3    | 0.08    | 0.08    | 0.13    | 0.09    |
| RASA3    | 0.08    | 0.06    | 0.19    | 0.19    |
| CFH      | 0.12    | 0.12    | 0.14    | 0.17    |
| PLEK     | 0.14    | 0.08    | 0.25    | 0.11    |
| KLRG1    | 0.06    | 0.03    | 0.38    | 0.12    |
| LEF1     | 0.08    | 0.08    | 0.27    | 0.27    |
| PXN      | 0.19    | 0.13    | 0.26    | 0.18    |
| KLRF1    | 0.22    | 0.05    | 0.40    | 0.09    |
| GZMH     | 0.17    | 0.14    | 0.29    | 0.21    |
| ITGB1    | 0.18    | 0.23    | 0.17    | 0.26    |
| FAM65B   | 0.13    | 0.16    | 0.27    | 0.29    |
| C1orf162 | 0.14    | 0.26    | 0.21    | 0.27    |
| VCL      | 0.25    | 0.21    | 0.24    | 0.21    |
| KLF3     | 0.15    | 0.11    | 0.38    | 0.30    |
| GNLY     | 0.14    | 0.21    | 0.23    | 0.42    |
| ITGA6    | 0.23    | 0.23    | 0.28    | 0.27    |
| CDC25B   | 0.22    | 0.28    | 0.24    | 0.29    |
| C1orf38  | 0.25    | 0.23    | 0.34    | 0.21    |
| CTSW     | 0.22    | 0.27    | 0.27    | 0.29    |
| LY75     | 0.31    | 0.32    | 0.36    | 0.26    |
| C12orf75 | 0.21    | 0.31    | 0.35    | 0.37    |
| AGTPBP1  | 0.20    | 0.29    | 0.43    | 0.33    |
| TMEM55A  | 0.24    | 0.33    | 0.31    | 0.41    |
| ZNF683   | 0.32    | 0.27    | 0.40    | 0.32    |
| STK38    | 0.31    | 0.33    | 0.34    | 0.34    |
| FLNA     | 0.25    | 0.35    | 0.35    | 0.44    |
| HLA-DPB1 | 0.28    | 0.30    | 0.40    | 0.42    |
| ADD3     | 0.35    | 0.41    | 0.38    | 0.30    |
| ITGB2    | 0.35    | 0.23    | 0.53    | 0.33    |
| DPH5     | 0.35    | 0.44    | 0.32    | 0.39    |
| ST6GAL1  | 0.23    | 0.33    | 0.46    | 0.49    |
| TMEM63A  | 0.40    | 0.31    | 0.41    | 0.41    |
| S1PR4    | 0.38    | 0.40    | 0.38    | 0.39    |
| D4S234E  | 0.34    | 0.36    | 0.37    | 0.48    |
| NHSL2    | 0.28    | 0.37    | 0.45    | 0.51    |
| ARRB1    | 0.47    | 0.37    | 0.48    | 0.31    |
| NOSIP    | 0.40    | 0.46    | 0.40    | 0.40    |
| SH3BP5   | 0.42    | 0.44    | 0.41    | 0.42    |
| EOMES    | 0.49    | 0.27    | 0.52    | 0.41    |
| TXNIP    | 0.52    | 0.56    | 0.32    | 0.30    |
| CAPN2    | 0.33    | 0.51    | 0.33    | 0.54    |
| IQSEC1   | 0.36    | 0.40    | 0.46    | 0.49    |
| PLSCR3   | 0.34    | 0.54    | 0.34    | 0.53    |
| GPX7     | 0.42    | 0.49    | 0.57    | 0.40    |
| IL10RA   | 0.37    | 0.46    | 0.51    | 0.54    |
| PDZD4    | 0.40    | 0.47    | 0.44    | 0.61    |
| RAP2B    | 0.42    | 0.45    | 0.50    | 0.58    |
| BIN2     | 0.38    | 0.54    | 0.52    | 0.52    |
| NKG7     | 0.41    | 0.65    | 0.37    | 0.56    |
| PIK3R5   | 0.41    | 0.43    | 0.64    | 0.55    |
| ARHGAP25 | 0.52    | 0.55    | 0.49    | 0.54    |
| GTF3A    | 0.52    | 0.61    | 0.54    | 0.54    |
| ARHGEF18 | 0.57    | 0.52    | 0.58    | 0.61    |
| DPEP2    | 0.52    | 0.57    | 0.62    | 0.61    |

**Supplemental Figure 4** Protein-protein interaction networks reveal centrality of AP-1 signalling in gut T<sub>EM</sub> cells. **(a-d)** Transcripts overexpressed in IEL CD4<sup>+</sup> T<sub>EM</sub> cells relative to blood CD4<sup>+</sup> T<sub>EM</sub> cells **(a)**, IEL CD8<sup>+</sup> T<sub>EM</sub> cells relative to peripheral blood CD8<sup>+</sup> T<sub>EM</sub> cells **(b)**, LPL CD4<sup>+</sup> T<sub>EM</sub> cells relative to peripheral blood CD4<sup>+</sup> T<sub>EM</sub> cells **(c)**, and LPL CD8<sup>+</sup> T<sub>EM</sub> cells relative to peripheral blood CD8<sup>+</sup> T<sub>EM</sub> cells **(d)** were used to seed a protein-protein interaction networks. All proteins showing evidence of direct interaction with the seed protein list were included in the networks, as described in the Methods. Nodes, representing individual transcripts are distributed based upon strength of interaction data, and both nodes and edges are given prominence based upon criticality to overall network structure, as described in the Methods.

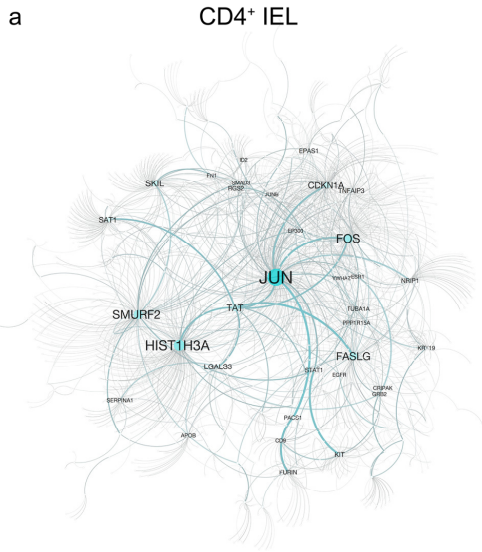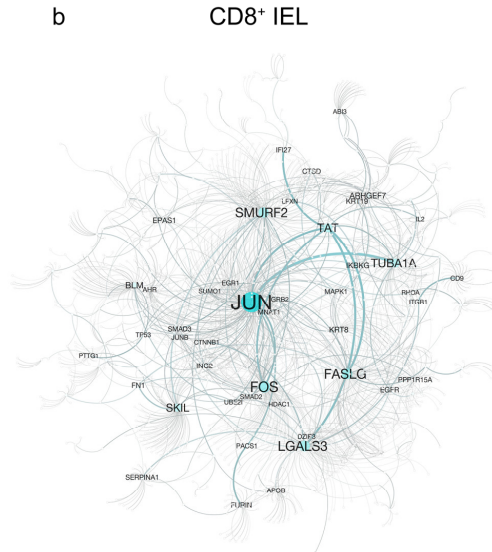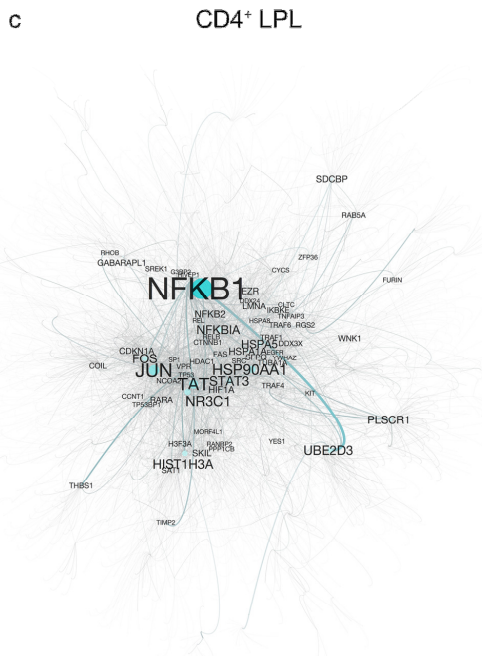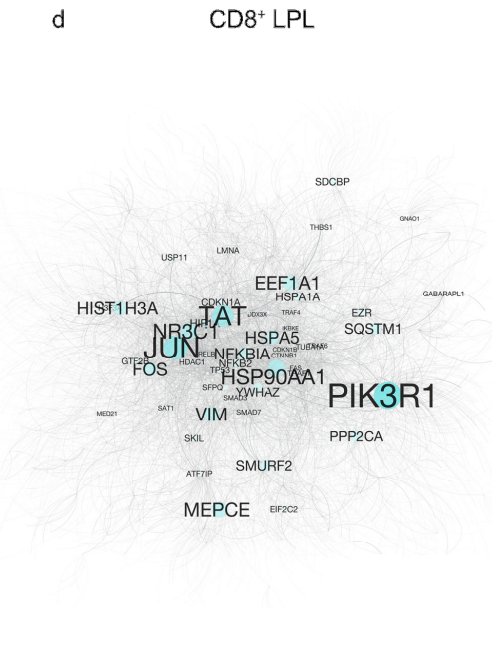

**Supplemental Figure 5** Risk loci for intestinal inflammatory pathologies are not enriched for genes upregulated in blood T<sub>EM</sub> populations relative to blood. Genetic risk loci associated with a range of diseases and traits, as indicated, were tested for overlap with transcripts showing downregulation in specific gut T<sub>EM</sub> populations relative to paired peripheral blood T<sub>EM</sub> populations, according to the algorithm illustrated in Figure 2 and as described in the methods. The proportion of intervals containing one or more downregulated genes within a window extending 0.2 cM either side of the lead SNP, is shown for each trait/gene list combination, with background colouring indicating the significance of the observation, as per the legend.

| Trait / Disease         |        | Crohn's | UC   | Celiac | PBC  | T1D  | SLE  | RMA  | Psoriasis | Asthma | MS   | BMI  | Height | Cholesterol |
|-------------------------|--------|---------|------|--------|------|------|------|------|-----------|--------|------|------|--------|-------------|
| SNPs                    |        | 740     | 133  | 31     | 23   | 39   | 24   | 32   | 29        | 19     | 51   | 37   | 188    | 52          |
| Expression comparison   | Subset |         |      |        |      |      |      |      |           |        |      |      |        |             |
| Blood upregulated v LPL | CD4    | 0.14    | 0.14 | 0.10   | 0.13 | 0.10 | 0.17 | 0.13 | 0.14      | 0.16   | 0.20 | 0.08 | 0.13   | 0.12        |
|                         | CD8    | 0.12    | 0.15 | 0.06   | 0.09 | 0.03 | 0.17 | 0.13 | 0.14      | 0.16   | 0.24 | 0.14 | 0.09   | 0.15        |
| Blood upregulated v IEL | CD4    | 0.12    | 0.13 | 0.13   | 0.22 | 0.13 | 0.17 | 0.13 | 0.10      | 0.26   | 0.18 | 0.08 | 0.11   | 0.13        |
|                         | CD8    | 0.14    | 0.12 | 0.13   | 0.13 | 0.13 | 0.17 | 0.13 | 0.07      | 0.21   | 0.20 | 0.11 | 0.10   | 0.15        |

Raine *et al.* Supplemental Figure 5



**Supplemental Figure 6** Differences in *ex vivo* cell handling do not stimulate differences in gene expression observed in CD4<sup>+</sup> T<sub>EM</sub> cells. Peripheral blood mononuclear cells isolated from healthy control individuals were subjected to conditions simulating the process used to extract IEL or LPL (or left 'untreated' on ice) prior to antibody labelling and cell sorting to isolate CD4<sup>+</sup> T<sub>EM</sub> cells. These were used for expression microarray analysis using exactly the same laboratory and computational pipeline as in the original manuscript. RMA normalised expression values (after filtering for detected coding transcripts as in the original manuscript) are shown compared to expression values from 'untreated' cells for cells exposed to EDTA/DTT (a) or cells exposed to EDTA/DTT then collagenase digestion (b). Coefficients of determination (denoted as  $r^2$ ) were determined for each correlation as shown. Using the same criteria as in the main study to determine differentially expressed genes between these cell populations (adj.  $p$  value <0.05, fold-change  $\geq$  1.4), only 5 transcripts showed differential expression between Blood-EDTA/DTT and untreated blood CD4<sup>+</sup> T<sub>EM</sub> cells, and only 1 transcript between Blood-EDTA/DTT-collagenase and untreated blood CD4<sup>+</sup> T<sub>EM</sub> cells.

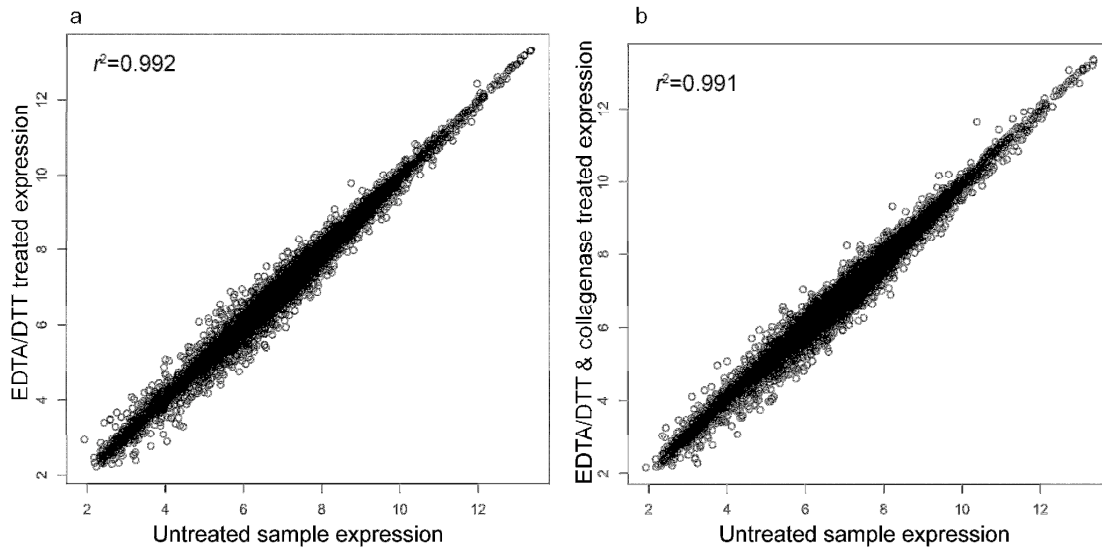

Raine *et al.* Supplemental Figure 6

**Supplemental Table 1** Transcription factor enrichment analysis suggests HNF4a as a key regulator of LPL T<sub>EM</sub> genes with binding sites modified by IBD associated SNPs. A database of human ChIP-Seq data was interrogated to find transcription factors predicted to regulate genes upregulated in the LPL CD4<sup>+</sup> and CD8<sup>+</sup> T<sub>EM</sub> cell populations (relative to paired peripheral blood T<sub>EM</sub> cell populations). A *p* value for each transcription factor was calculated based upon the frequency of ChIP-Seq targets within the lists of differentially expressed genes, compared to the total frequency of targets within the total background ChIP-Seq dataset, and corrected for multiple testing. Next, all focal SNPs reported for IBD, as well as all SNPs in tight linkage disequilibrium, were analysed for the presence of binding sites for the transcription factors identified as potentially active, using a different expert curated ChIP-Seq database. Finally, for those transcription factors showing multiple potential binding sites modified by IBD SNPs (and SNPs in linkage disequilibrium), we used a Chi-squared test to assess the distribution of binding sites between those IBD-associated SNPs that overlapped a gene upregulated in the relevant gut T<sub>EM</sub> population, and those IBD-associated SNPs that did not show such overlap. In this way, for both CD4<sup>+</sup> and CD8<sup>+</sup> LPL T<sub>EM</sub> cells, HNF4a emerged as a potentially active transcription factor, with a significant enrichment of binding sites modified by IBD-associated SNPs whose genetic risk loci contained an upregulated gene.

| Gene list             | TF prediction        |                                       |                                 |                         | SNP-TF scoring         |                               |                |
|-----------------------|----------------------|---------------------------------------|---------------------------------|-------------------------|------------------------|-------------------------------|----------------|
|                       | Transcription factor | Fraction of targets in diff gene list | Fraction of targets in database | adjusted <i>p</i> value | targets / overlap SNPs | targets / non-overlapped SNPs | <i>p</i> value |
| CD4 <sup>+</sup> LPL↑ | GATA2                | 0.2104                                | 0.0803                          | 1.11E-16                | 5/29                   | 16/134                        | 0.4398         |
|                       | HNF4A                | 0.3522                                | 0.2027                          | 1.05E-12                | 9/29                   | 16/134                        | 0.0097         |
| CD8 <sup>+</sup> LPL↑ | GATA2                | 0.2080                                | 0.0803                          | 3.61E-17                | 7/34                   | 14/129                        | 0.1317         |
|                       | HNF4A                | 0.3562                                | 0.2027                          | 4.84E-14                | 10/34                  | 15/129                        | 0.0105         |
|                       | CDX2                 | 0.0420                                | 0.0168                          | 3.53E-04                | 6/34                   | 16/129                        | 0.4260         |
|                       | SPI1                 | 0.0730                                | 0.0416                          | 1.67E-03                | 5/34                   | 15/129                        | 0.6265         |
